# Supplementary material for: The Sec61 translocon limits IRE1α signaling during the unfolded protein response
Source: eLife. 2017 May 15;6:e27187. doi: 10.7554/eLife.27187 (PMC5449187; doi:10.7554/eLife.27187)
Supplement: Figure 3—source data 1. — DOI: http://dx.doi.org/10.7554/eLife.27187.009 [file elife-27187-fig3-data1.xlsx]

## Sheet: Sheet1
Doxycycline titration and quantification of IRE1α clusters as described Figure 3C
TM 5 ug/ml, Doxycycline is in ng/ml
Cell type	Treatment	image name	Total # of cells	# cells with clusters	ratio clusters	% clusters	Mean	S.D.	S.E.M.
Ire1	0-2ng/ml Dox, TM			NO CLUSTERS OBSERVED
Ire1	5 ng Dox, TM	Series001	56	0	0	0	3.97255	3.85238	2.22417
		Series003	71	3	0.0422535	4.22535
		Series005	39	3	0.0769231	7.69231
Ire1	20 ng Dox, TM	Series002	67	2	0.0298507	2.98507	5.3264	2.06662	1.19317
		Series005	82	5	0.0609756	6.09756
		Series007	58	4	0.0689655	6.89655
Ire1	50 ng Dox, TM	Series015	52	5	0.0961538	9.61538	11.5824	2.4501	1.22505
		Series009	39	4	0.102564	10.2564
		Series005	44	5	0.113636	11.3636
		Series007	53	8	0.150943	15.0943
Ire1	200 ng Dox, TM	Series012	45	4	0.0888889	8.88889	15.0647	4.38663	2.19331
		Series010	40	6	0.15	15
		Series005	38	7	0.184211	18.4211
		Series002	39	7	0.179487	17.9487
Cell type	Treatment	image name	Total # of cells	# cells with clusters	ratio clusters	% clusters	Mean	S.D	S.E.M.
wIre1	0 ng, TM	Series002	53	0	0	0	0	0
		Series006	74	0	0	0
		Series008	48	0	0	0
wIre1	0.1 ng Dox, TM	Series002	40	4	0.1	10	16.7393	9.96395	4.45601
		Series003	59	11	0.186441	18.6441
		Series004	42	4	0.0952381	9.52381
		Series005	42	14	0.333333	33.3333
		Series006	41	5	0.121951	12.1951
wIre1	0.2 ng Dox, TM	Series007	34	2	0.0588235	5.88235	19.2646	11.3523	5.07691
		Series008	43	5	0.116279	11.6279
		Series009	35	11	0.314286	31.4286
		Series010	46	14	0.304348	30.4348
		Series011	59	10	0.169492	16.9492
wIre1	0.5 ng dox, TM	Series004	74	44	0.594595	59.4595	56.3543	2.82953	1.63363
		Series006	88	49	0.556818	55.6818
		Series008	102	55	0.539216	53.9216
wIre1	1 ng Dox,TM	Series002	64	43	0.671875	67.1875	67.1944	7.64851	3.82425
		Series004	64	39	0.609375	60.9375
		Series006	59	46	0.779661	77.9661
		Series008	67	42	0.626866	62.6866
wIre1	2ng Dox, TM	Series002	53	46	0.867925	86.7925	91.0415	4.14869	2.39525
		Series 004	80	73	0.9125	91.25
		Series006	61	58	0.95082	95.082
wIre1	5 ng Dox, TM	Series002	39	38	0.974359	97.4359	94.8444	4.30857	2.15429
		Series011	55	52	0.945455	94.5455
		Series013	67	66	0.985075	98.5075
		Series015	72	64	0.888889	88.8889
wIre1	20 ng Dox, TM	Series001	65	62	0.953846	95.3846	95.7293	4.10922	2.37246
		Series003	75	75	1	100
		Series005	61	56	0.918033	91.8033
wIre1	50 ng Dox, TM	Series004	50	50	1	100	98.3196	1.26272	0.631359
		Series006	46	45	0.978261	97.8261
		Series008	64	63	0.984375	98.4375
		Series010	67	65	0.970149	97.0149
wIre1	200 ng Dox, TM	Series002	70	58	0.828571	82.8571	91.0762	7.2111	4.16333
		Series004	82	79	0.963415	96.3415
		Series008	67	63	0.940299	94.0299
