# Supplementary material for: The Sec61 translocon limits IRE1α signaling during the unfolded protein response
Source: eLife. 2017 May 15;6:e27187. doi: 10.7554/eLife.27187 (PMC5449187; doi:10.7554/eLife.27187)
Supplement: Figure 4—source data 1. — DOI: http://dx.doi.org/10.7554/eLife.27187.013 [file elife-27187-fig4-data1.xlsx]

## Sheet: Sheet1
Figure 4B
Doxycycline titration and activation of IRE1α, wIRE1α or sIRE1α as described Figure 4B
IRE1
Dox. Conc. (ng/ml)	Phos	No Phos	SUM	Phos/No Phos	x100
0.5	1.72	1.6	3.32	0.518072	51.8072
1	10	7.7	17.7	0.564972	56.4972
2	14.38	8.47	22.85	0.629322	62.9322
5	19.91	10.96	30.87	0.644963	64.4963
5 + TG	8.65	0	8.65	1	100
wIRE1
Dox. Conc. (ng/ml)	Phos	No Phos	SUM	Phos/No Phos	x100
0.5	10	4.54	14.54	0.687758	68.7758
1	14.83	4.14	18.97	0.781761	78.1761
2	13.7	4.83	18.53	0.739342	73.9342
5	20.06	4.95	25.01	0.802079	80.2079
5 + TG	9.61	0	9.61	1	100
sIRE1
Dox. Conc. (ng/ml)	Phos	No Phos	SUM	Phos/No Phos	x100
0.5	12.28	14.41	26.69	0.460097	46.0097
1	19.38	15.63	35.01	0.553556	55.3556
2	25.27	27.54	52.81	0.478508	47.8508
5	25.58	27.64	53.22	0.480646	48.0646
5 + TG	16.25	0	16.25	1	100
