# Supplementary material for: The Sec61 translocon limits IRE1α signaling during the unfolded protein response
Source: eLife. 2017 May 15;6:e27187. doi: 10.7554/eLife.27187 (PMC5449187; doi:10.7554/eLife.27187)
Supplement: Figure 4—source data 2. — DOI: http://dx.doi.org/10.7554/eLife.27187.014 [file elife-27187-fig4-data2.xlsx]

## Sheet: Sheet1
Figure 4D
Activationof IRE1α, wIRE1α or sIRE1α in Tg-treated cells as described Figure 4D
TG 1 ug/ml
IRE1
Time (min)	Phos	No Phos	SUM	Phos/No Phos	x100
0	0	10	10	0	0
5	0	10.7	10.7	0	0
10	1.64	8.48	10.12	0.162055	16.2055
15	5.07	3.16	8.23	0.616039	61.6039
30	4.21	0	4.21	1	100
60	5.06	0	5.06	1	100
wIRE1
Time (min)	Phos	No Phos	SUM	Phos/No Phos	x100
0	1.54	10.18	11.72	0.131399	13.1399
5	0.98	6.08	7.06	0.13881	13.881
10	3.72	2.99	6.71	0.554396	55.4396
15	7.46	0	7.46	1	100
30	6.13	0	6.13	1	100
60	9.27	0	9.27	1	100
sIRE1
Time (min)	Phos	No Phos	SUM	Phos/No Phos	x100
0	0	22.33	22.33	0	0
5	0	24.03	24.03	0	0
10	0	21.36	21.36	0	0
15	0.9	16.17	17.07	0.0527241	5.27241
30	16.17	1.22	17.39	0.929845	92.9845
60	15.21	2.57	17.78	0.855456	85.5456
