# Supplementary material for: The Sec61 translocon limits IRE1α signaling during the unfolded protein response
Source: eLife. 2017 May 15;6:e27187. doi: 10.7554/eLife.27187 (PMC5449187; doi:10.7554/eLife.27187)
Supplement: Figure 5—source data 1. — DOI: http://dx.doi.org/10.7554/eLife.27187.016 [file elife-27187-fig5-data1.xlsx]

## Sheet: Sheet1
Figure 5B
Attenuation of IRE1α and wIRE1α in Tg-treated cells as described in Figure 5B
TG 2.5 ug/ml
Ire1
Time (Hr)	Phos	No Phos	SUM	Phos/No Phos	x100
0	11.76	188.24	200	0.0588	5.88
2	205.92	3.17	209.09	0.984839	98.4839
5	143.08	5.31	148.39	0.964216	96.4216
9	22.08	54.61	76.69	0.287912	28.7912
12	12.18	58.43	70.61	0.172497	17.2497
26	7.06	87	94.06	0.0750585	7.50585
wIRE1
Time (Hr)	Phos	No Phos	SUM	Phos/No Phos	x100
0	40.85	156.34	197.19	0.207161	20.7161
2	175.35	0	175.35	1	100
5	139.32	0	139.32	1	100
9	182.49	10.99	193.48	0.943198	94.3198
12	117.4	19.66	137.06	0.856559	85.6559
26	39.54	9.39	48.93	0.808093	80.8093
