# Supplementary material for: The Sec61 translocon limits IRE1α signaling during the unfolded protein response
Source: eLife. 2017 May 15;6:e27187. doi: 10.7554/eLife.27187 (PMC5449187; doi:10.7554/eLife.27187)
Supplement: Figure 5—source data 2. — DOI: http://dx.doi.org/10.7554/eLife.27187.017 [file elife-27187-fig5-data2.xlsx]

## Sheet: Sheet1
Figure 5D
Attenuation of IRE1α and wIRE1α in TM-treated cells as described Figure 5D
TM 10 ug/ml
IRE1
Time (Hr)	Phos	No Phos	SUM	Phos/No Phos	x100
0	0	11.5	11.5	0	0
2	23.88	0	23.88	1	100
5	18.69	2.02	20.71	0.902463	90.2463
9	5.86	11.83	17.69	0.331261	33.1261
12	1.5	10	11.5	0.130435	13.0435
26	1.19	9.07	10.26	0.115984	11.5984
wIRE1
Time (Hr)	Phos	No Phos	SUM	Phos/No Phos	x100
0	14.28	19.1	33.38	0.427801	42.7801
2	30.45	0	30.45	1	100
5	25.08	0	25.08	1	100
9	19.38	4.84	24.22	0.800165	80.0165
12	16.79	5.81	22.6	0.74292	74.292
26	6.62	1.9	8.52	0.776995	77.6995
