# Supplementary material for: The Sec61 translocon limits IRE1α signaling during the unfolded protein response
Source: eLife. 2017 May 15;6:e27187. doi: 10.7554/eLife.27187 (PMC5449187; doi:10.7554/eLife.27187)
Supplement: Figure 5—source data 3. — DOI: http://dx.doi.org/10.7554/eLife.27187.018 [file elife-27187-fig5-data3.xlsx]

## Sheet: Sheet1
Figure 5F
Attenuation of IRE1α and wIRE1α in XBP1s expressing cells as described Figure 5F
TG 1 ug/ml
IRE1
Time (hr)	Phos	No Phos	SUM	Phos/No Phos	x100
0	0	24.45	24.45	0	0
2	12.55	6.04	18.59	0.675094	67.5094
5	8.14	10	18.14	0.448732	44.8732
9	3.2	16.75	19.95	0.160401	16.0401
12	2.75	15.01	17.76	0.154842	15.4842
15	2.25	15.14	17.39	0.129385	12.9385
wIRE1
Time (hr)	Phos	No Phos	SUM	Phos/No Phos	x100
0	3.27	28.67	31.94	0.102379	10.2379
2	18.16	8.42	26.58	0.68322	68.322
5	16.53	5.97	22.5	0.734667	73.4667
9	9.88	6.12	16	0.6175	61.75
12	15.31	10.63	25.94	0.590208	59.0208
15	11.5	12.36	23.86	0.481978	48.1978
