# Supplementary material for: The Sec61 translocon limits IRE1α signaling during the unfolded protein response
Source: eLife. 2017 May 15;6:e27187. doi: 10.7554/eLife.27187 (PMC5449187; doi:10.7554/eLife.27187)
Supplement: Figure 5—source data 4. — DOI: http://dx.doi.org/10.7554/eLife.27187.019 [file elife-27187-fig5-data4.xlsx]

## Sheet: Sheet1
Figure 5H
Attenuation of IRE1α and sIRE1α in Tg-treated cells as described in Figure 5H
TG 1 ug/ml
IRE1
Time (Hr)	Phos	No Phos	SUM	Phos/No Phos	x100
0	2.36	16.3	18.66	0.126474	12.6474
2	24.83	0	24.83	1	100
5	11.14	0	11.14	1	100
9	17.14	0	17.14	1	100
12	11.43	10	21.43	0.533364	53.3364
26	4.06	6.74	10.8	0.375926	37.5926
sIRE1
Time (Hr)	Phos	No Phos	SUM	Phos/No Phos	x100
0	6.99	38.24	45.23	0.154543	15.4543
2	34.46	0	34.46	1	100
5	34.02	0	34.02	1	100
9	30.83	0	30.83	1	100
12	9.6	19.91	29.51	0.325313	32.5313
26	1.18	16.19	17.37	0.0679332	6.79332
