# Supplementary material for: The Sec61 translocon limits IRE1α signaling during the unfolded protein response
Source: eLife. 2017 May 15;6:e27187. doi: 10.7554/eLife.27187 (PMC5449187; doi:10.7554/eLife.27187)
Supplement: Figure 6—source data 1. — DOI: http://dx.doi.org/10.7554/eLife.27187.023 [file elife-27187-fig6-data1.xlsx]

## Sheet: Sheet1
Figure 6B
Quantification of IRE1α clusters under sever stress
Cell Type	Series	Treatment	# total cells	#cells with clusters	ratio cells with clusters	% cells with clusters	Average	S.D.	SEM
Ire1	Series005	untreated	12	0	0	0	0	0	0							0
	Series007		9	0	0	0										0
	Series009		20	0	0	0										0
	Series011		29	0	0	0
	SEries013		43	0	0	0
Ire1	Series003	2.5 ug/ml TG	82	0	0	0	0	0
	Series006		41	0	0	0
	Series013		63	0	0	0
Ire1	Series003	10 ug/ml TG	23	11	0.478261	47.8261	58.1149	31.9493	14.2881
	Series005		36	26	0.722222	72.2222
	Series007		30	19	0.633333	63.3333
	Series009		38	4	0.105263	10.5263
			30	29	0.966667	96.6667
Cell Type	Series	Treatment	# total cells	#cells with clusters	ratio cells with clusters	% cells with clusters	Average	S.D.	SEM
wIRE1	Series003	untreated	41	0	0	0	4.05899	3.56724	1.59532
	Series005		51	5	0.0980392	9.80392
	Series007		27	1	0.037037	3.7037
	Series009		34	1	0.0294118	2.94118
	Series011		26	1	0.0384615	3.84615
wIRE1	Series006	2.5 ug/ml TG	61	39	0.639344	63.9344	80.8353	18.1391	10.4726
	Series003		57	57	1	100
	Series009		56	44	0.785714	78.5714
wIRE1	Series004	10 ug/ml TG	45	45	1	100	0.966379	4.7144	2.3572
	Series002		45	45	1	100
	Series007		40	36	0.9	90
	Series009		58	56	0.965517	96.5517
Cell Type	Series	Treatment	# total cells	#cells with clusters	ratio cells with clusters	% cells with clusters	Average	S.D.	SEM
sIRE1	Series002	untreated	14	0	0	0	0.793651	2.0998	0.793651
	Series004		20	0	0	0
	Series007		15	0	0	0
	Series009		18	1	0.0555556	5.55556
	Series012		17	0	0	0
	Series014		14	0	0	0
	Series016		21	0	0	0
sIRE1	Series006	TG 2.5ug/ml	37	0	0	0	0.512821	1.1467	0.512821
	Series008		38	0	0	0
	Series010		39	1	0.025641	2.5641
	Series012		34	0	0	0
	Series014		40	0	0	0
sIRE1	Series003	10 ug TG	39	22	0.564103	56.4103	0.36415	29.4266	13.16
	Series005		30	18	0.6	60
	Series007		28	16	0.571429	57.1429
	Series009		50	1	0.02	2
	Series011		46	3	0.0652174	6.52174
