# Supplementary material for: The Sec61 translocon limits IRE1α signaling during the unfolded protein response
Source: eLife. 2017 May 15;6:e27187. doi: 10.7554/eLife.27187 (PMC5449187; doi:10.7554/eLife.27187)
Supplement: Figure 6—source data 2. — DOI: http://dx.doi.org/10.7554/eLife.27187.024 [file elife-27187-fig6-data2.xlsx]

## Sheet: Sheet1
Figure 6D
Attenuation of IRE1α or wIRE1α under severe stress
10ug Tg/ml
Ire1
Time (Hr)	Phos	No Phos	SUM	Phos/No Phos	x100
0	13.76	186.24	200	0.0688	6.88
2	265.96	0	265.96	1	100
5	273.3	0	273.3	1	100
9	154.78	19.76	174.54	0.886788	88.6788
12	63.97	10.82	74.79	0.855328	85.5328
wIRE1
Time (hr)	Phos	No Phos	SUM	Phos/No Phos	x100
0	86.17	205.55	291.72	0.295386	29.5386
2	182.35	0	182.35	1	100
5	166.01	0	166.01	1	100
9	75.87	0	75.87	1	100
12	44.86	0	44.86	1	100
